# Supplementary material for: Compartmentalised expression of Delta-like 1 in epithelial somites is required for the formation of intervertebral joints
Source: PubMed Central journal article supplement (PMC1924847; doi:10.1186/1471-213x-7-68), 2007-06-17
Supplement: 1471-213X-7-68-S3.pdf [file 1471-213X-7-68-S3.pdf]

wt

tg

frontal

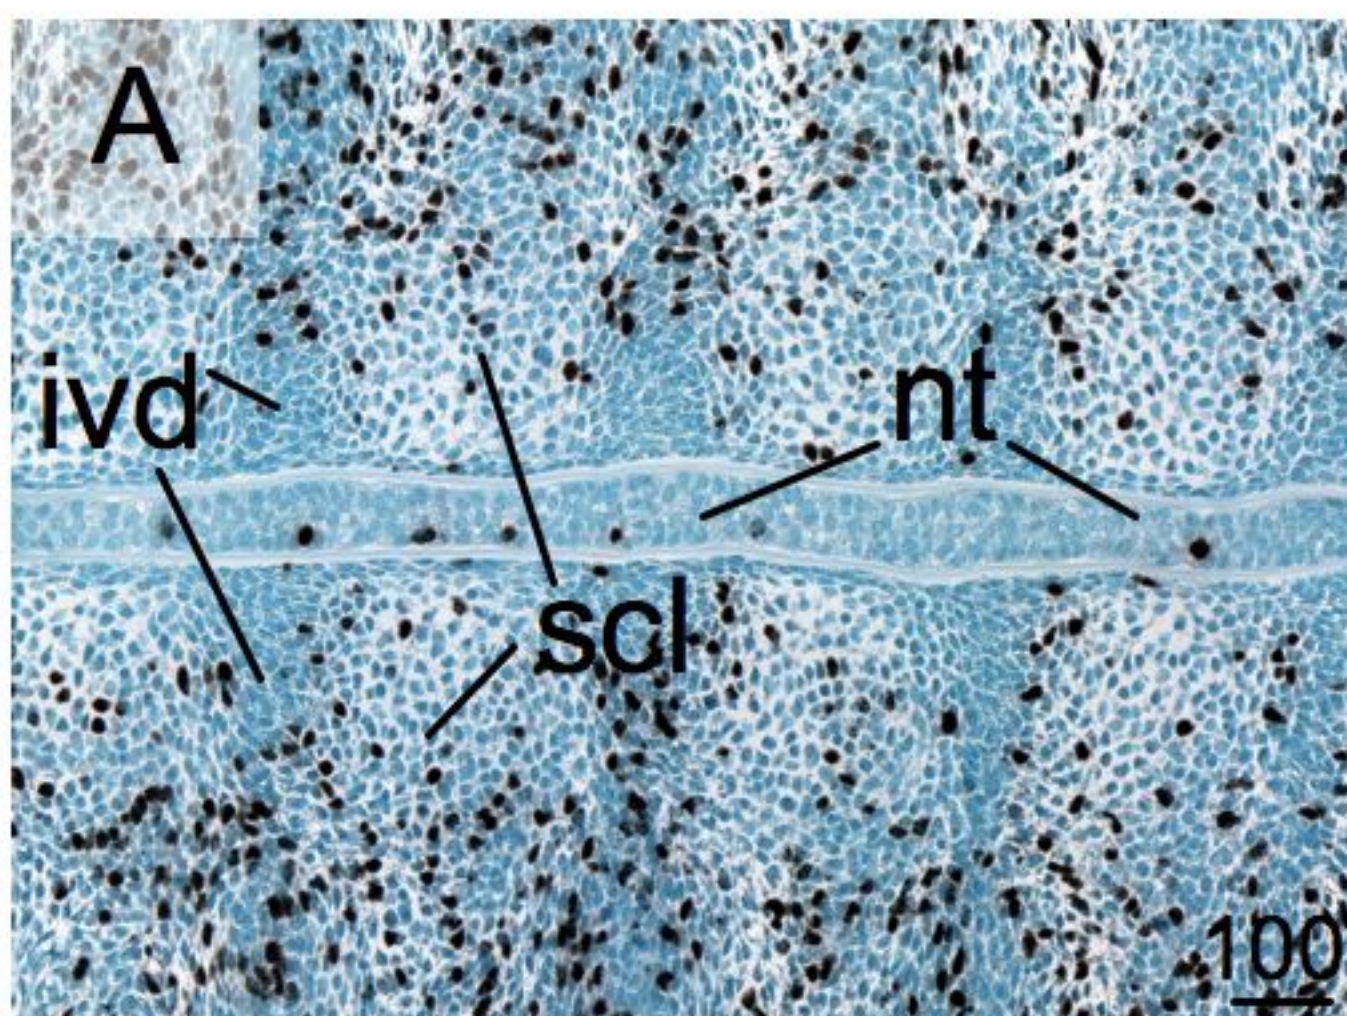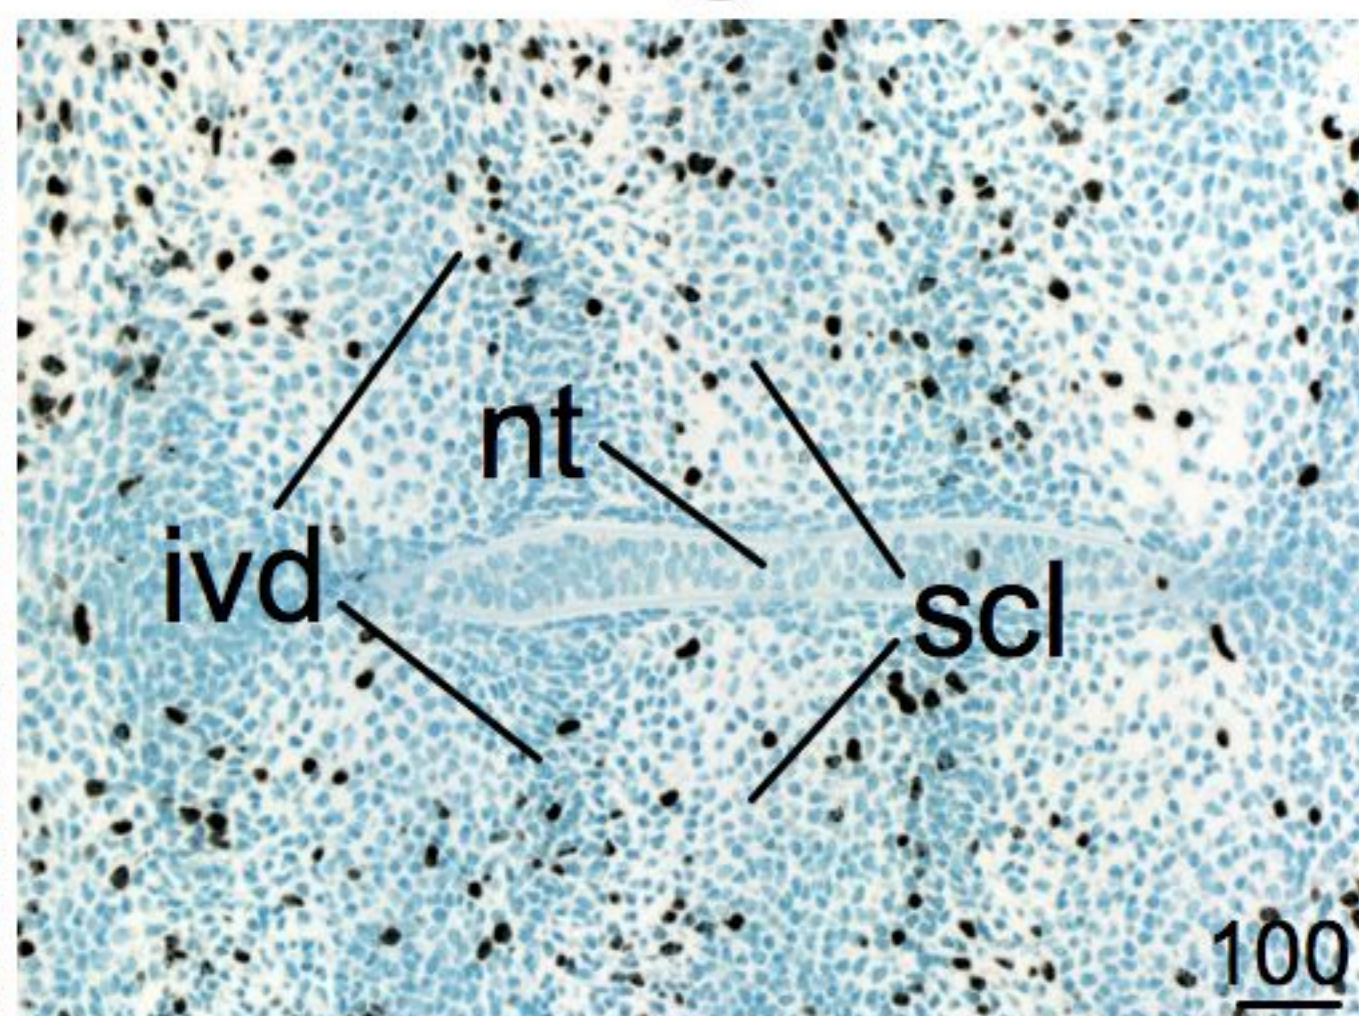

sagittal

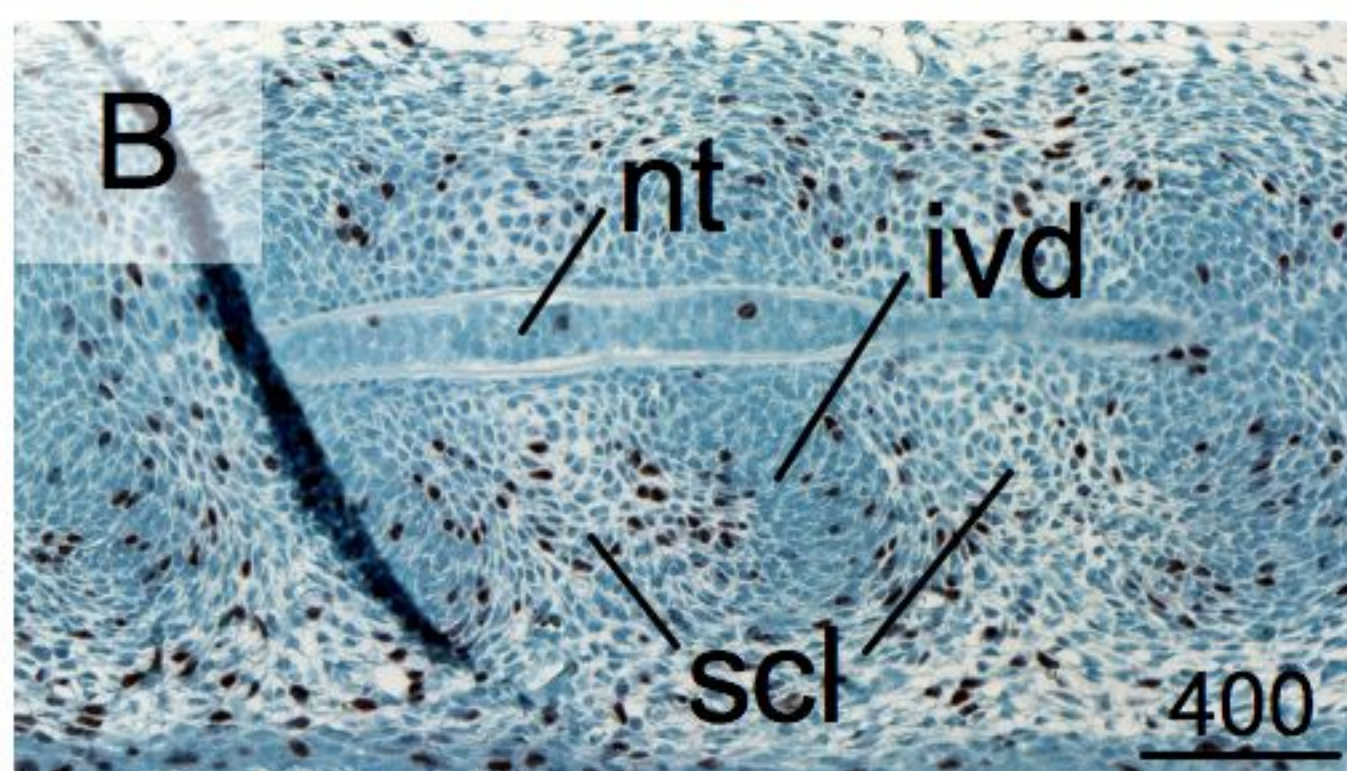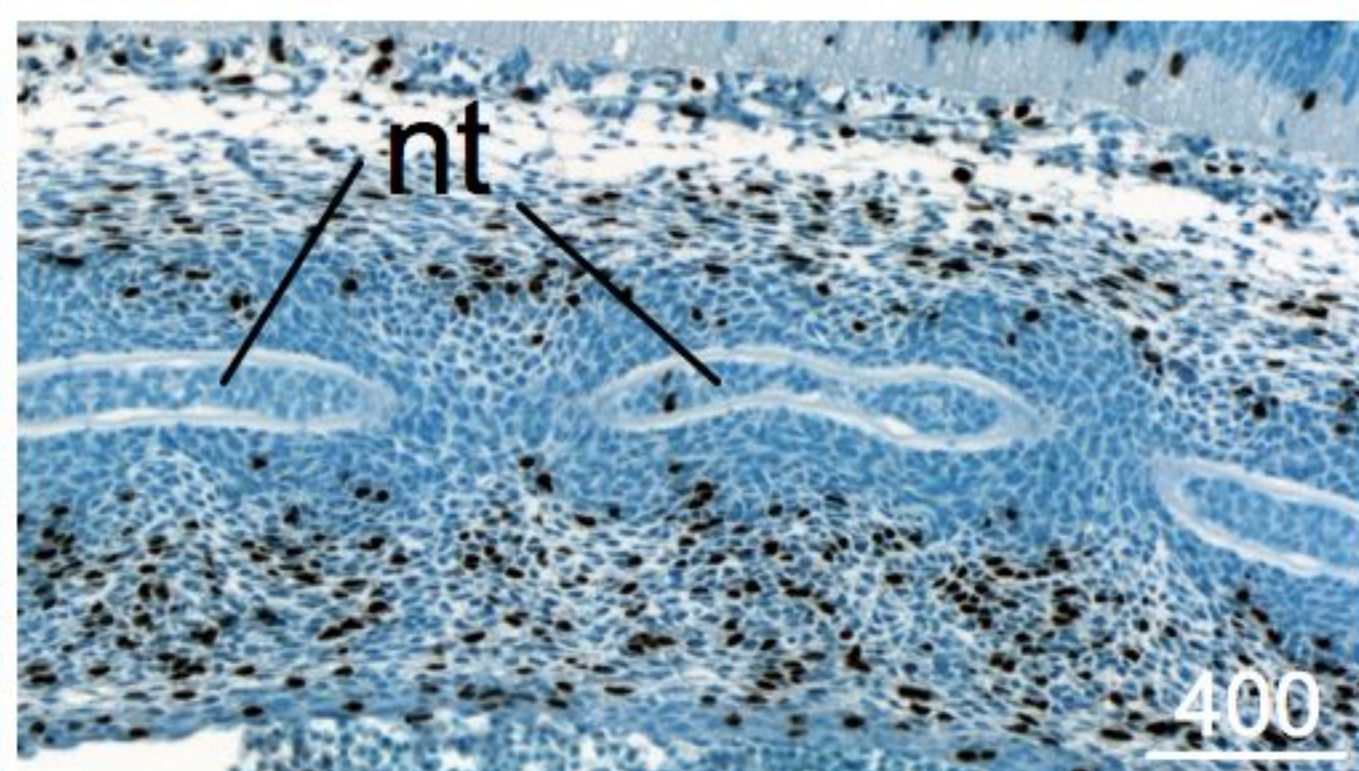

frontal

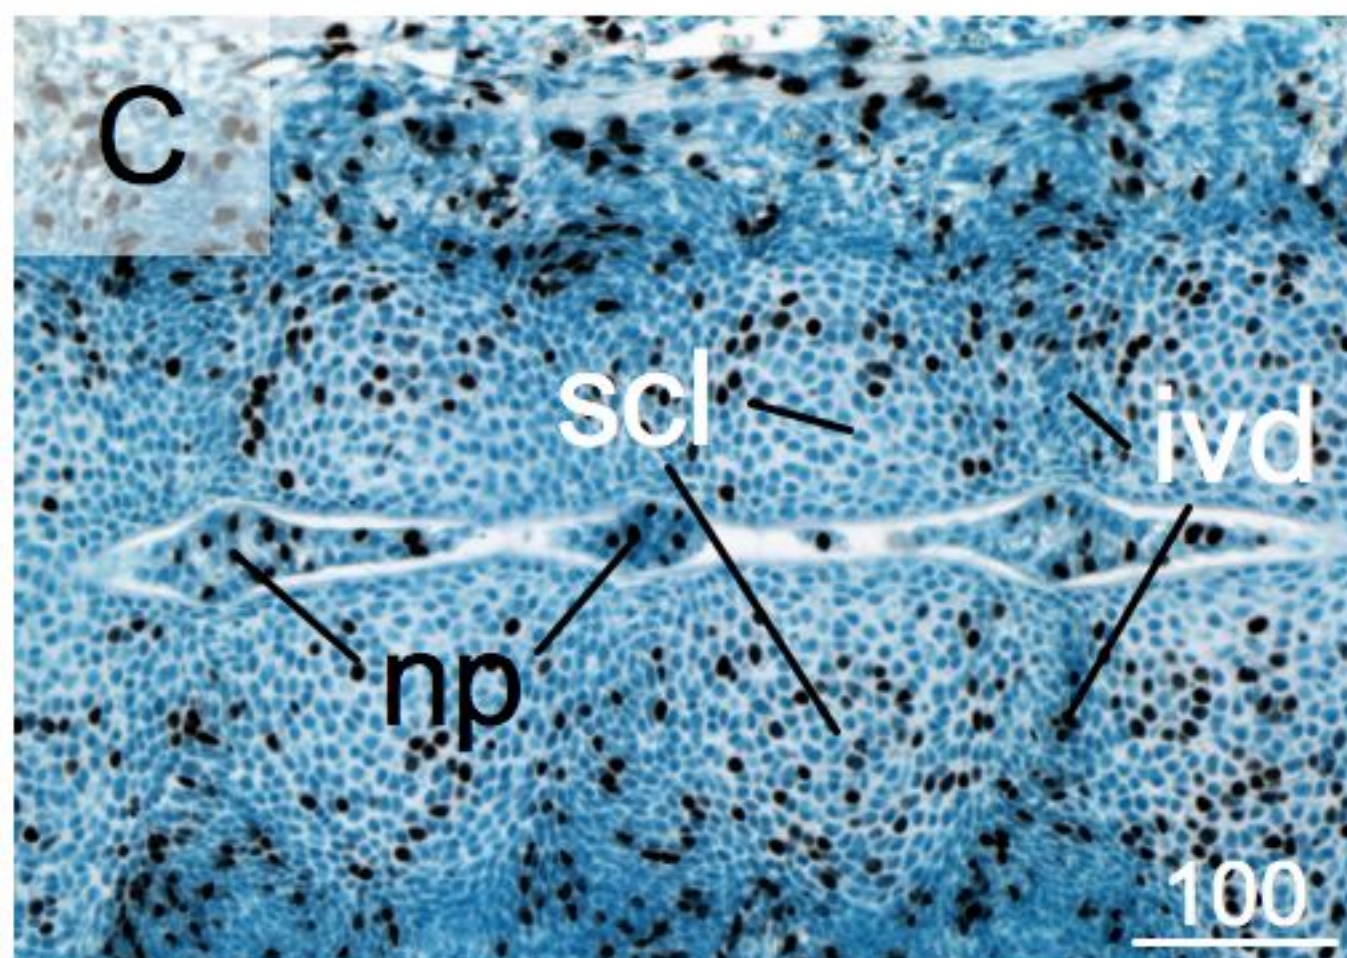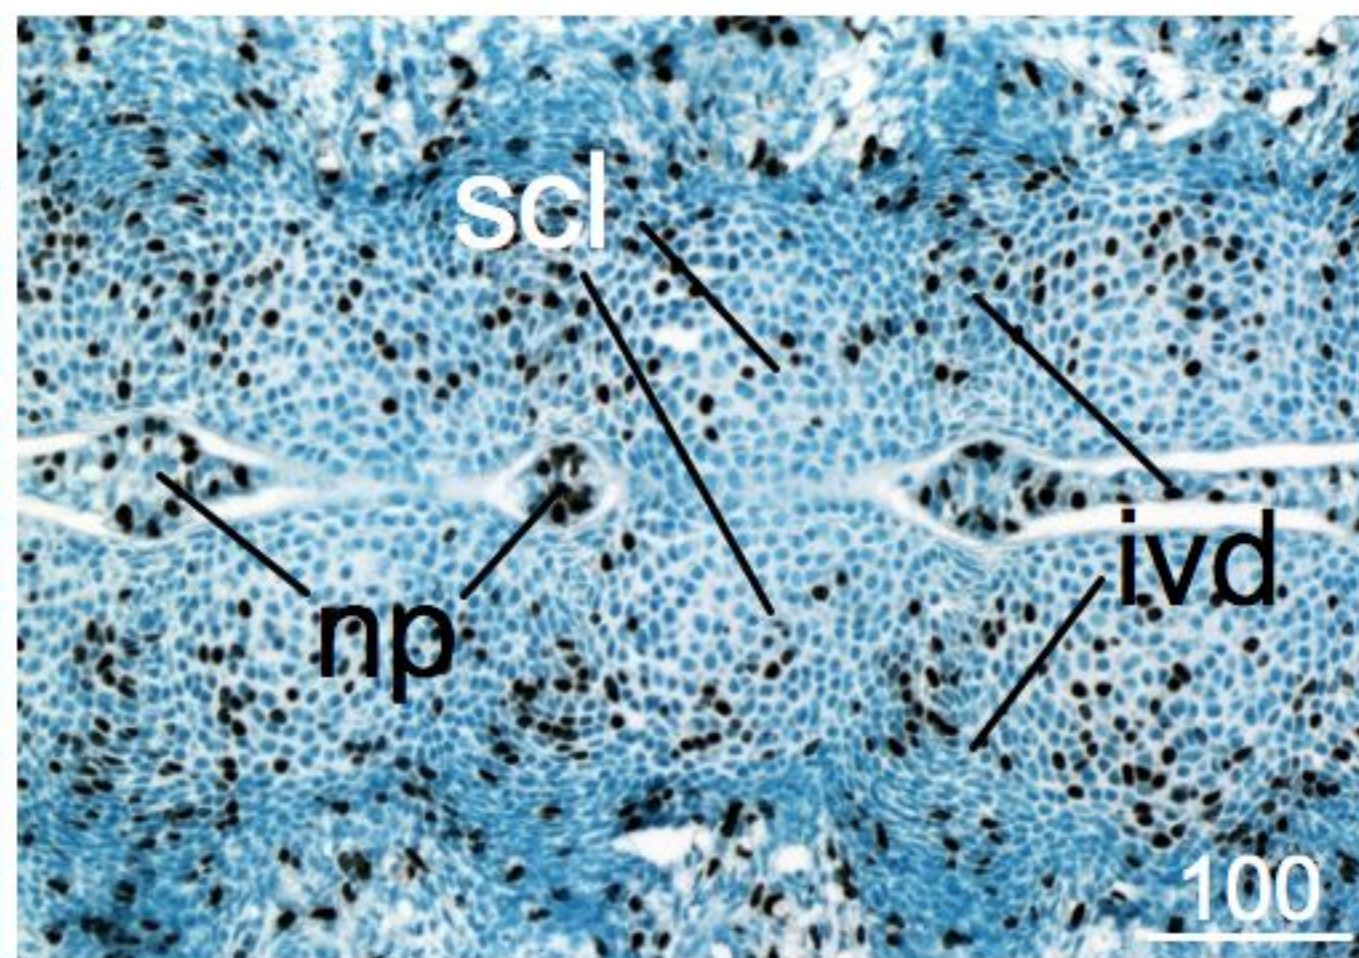

sagittal

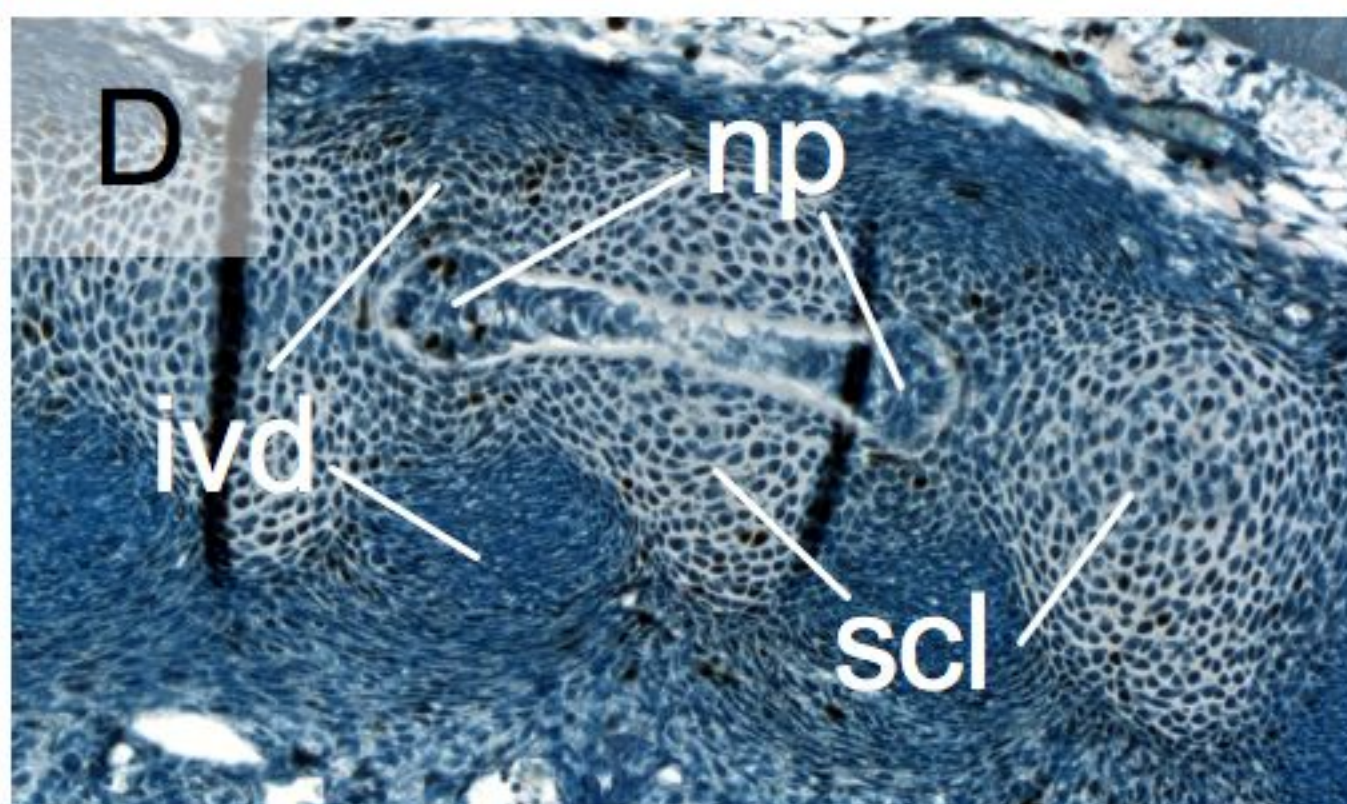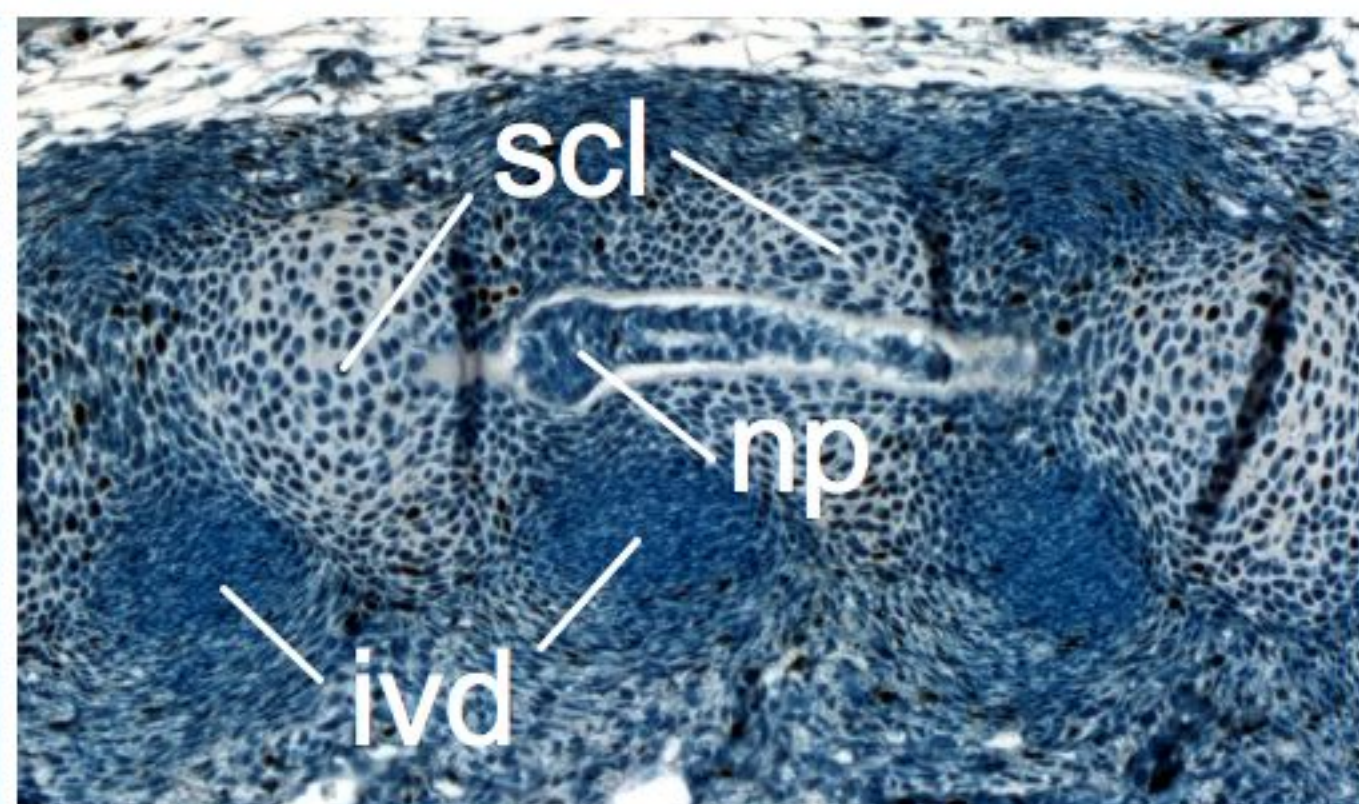

E 12.5

E 13.5
